# Supplementary material for: A neuronal relay mediates muscle-adipose communication that drives systemic metabolic adaptation to high-sugar diets
Source: Research Square preprint supplement (doi:10.21203/rs.3.rs-3291551/v1), 2023-09-19
Supplement: Supplementary file 1 [file 99190831344459d70fc956a7.pdf]

# Extended data

A neuronal relay mediates muscle-adipose communication that drives systemic metabolic adaptation to high-sugar diets

Olga Kubrak<sup>1,†</sup>, Anne F. Joergensen<sup>1, 2,†</sup>, Takashi Koyama<sup>1</sup>, Stanislav Nagy<sup>1</sup>, Mette Lassen<sup>1</sup>, Jacob Hald<sup>2</sup>, Dennis Madsen<sup>2</sup>, Kenneth V. Halberg<sup>1</sup>, Michael J. Texada<sup>1</sup>, Jakob L. Hansen<sup>2</sup>, and Kim Rewitz<sup>1,\*</sup>

<sup>†</sup> Equal contribution

<sup>1</sup> Department of Biology, University of Copenhagen, 2100 Copenhagen O, Denmark

<sup>2</sup> Novo Nordisk, Novo Nordisk Park, Maaløv, Denmark

\*Correspondence: [Kim.Rewitz@bio.ku.dk](mailto:Kim.Rewitz@bio.ku.dk)

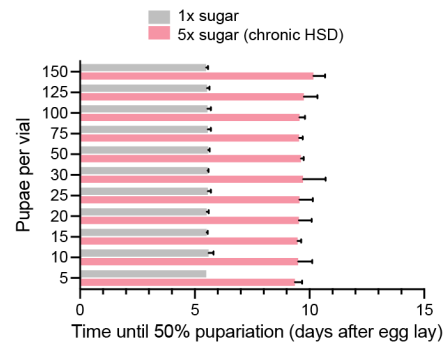

**Extended data, Figure 1.** Pupation timing for animals raised on normal or high-sugar diet, at a range of population densities. Statistics: Error bars represent mean and SEM.

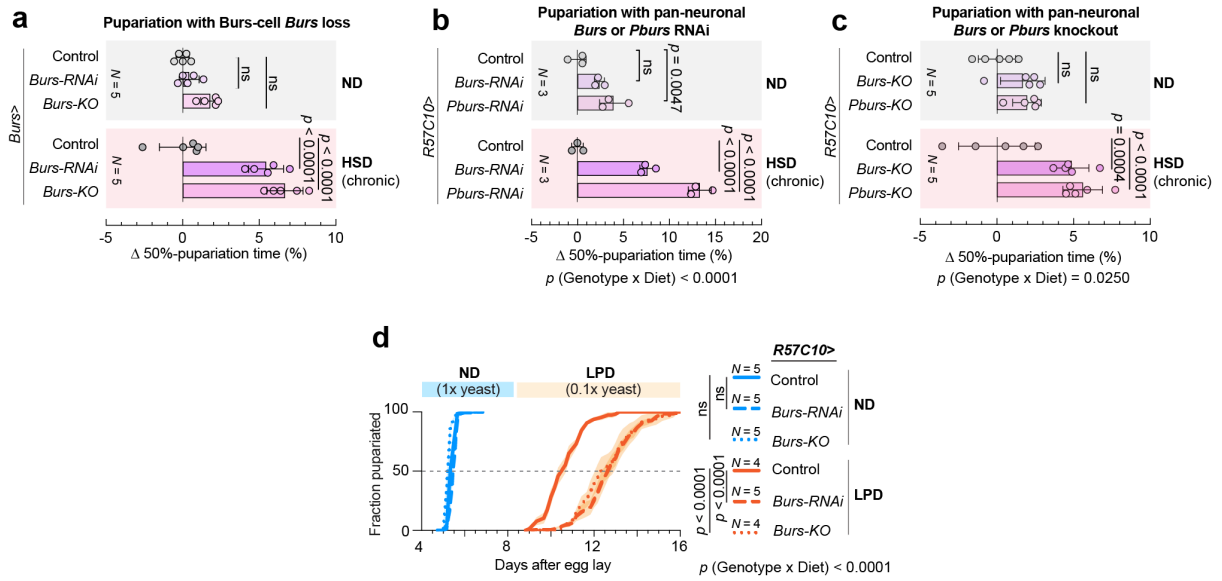

### Extended data, Figure 2.

(A) Related to Figure 2B. Difference in the time until 50% pupariation between controls and animals lacking *Burs* expression in the *Burs*-expressing cells, raised on normal or high-sugar diet.

(B) Difference in the time until 50% pupariation between controls and animals expressing pan-neuronal knockdown of *Burs* or *Pburs*, raised on normal or high-sugar diet.

(C) Difference in the time until 50% pupariation between controls and animals expressing pan-neuronal somatic deletion of *Burs* or *Pburs*, raised on normal or high-sugar diet.

(D) Pupation timing on normal and low-yeast diets for animals with pan-neuronal knockdown or knockout of *Burs*.

Statistics: Error bars represent mean and SEM. ns, not significant ( $p > 0.05$ ). A, B, C, D, one-way ANOVAs with Tukey's correction between 50%-pupariation times for multiple comparisons and two-way ANOVA for interaction.

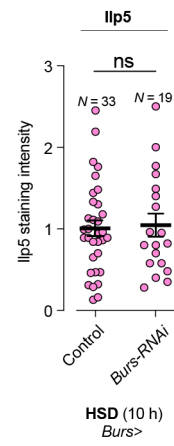

**Extended data, Figure 3.** Quantification of anti-Ilp5 staining intensity in multiple samples from animals with Burs<sup>+</sup> cell *Burs* loss. Statistics: Error bars represent mean and SEM. ns, not significant ( $p > 0.05$ ). Two-sided unpaired t-test.

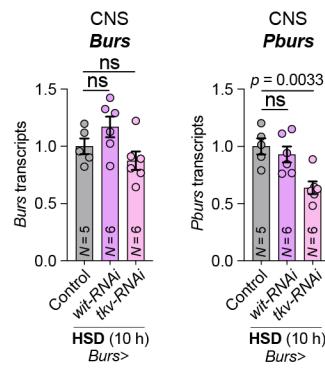

**Extended data, Figure 4.** Transcript levels of *Burs* (left) and *Pburs* (right) measured by qPCR in dissected CNS samples from controls and animals expressing RNAi against *wit* or *tkv* in the *Burs*-expressing cells, fed high-sugar diet for 10 hours. Statistics: Error bars represent mean and SEM. ns, not significant ( $p > 0.05$ ). One-way ANOVAs with Dunnett's correction.

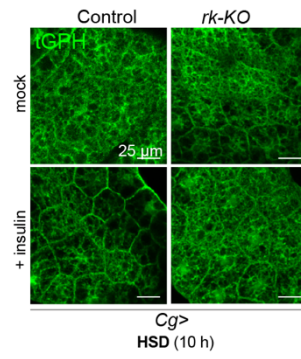

**Extended data, Figure 5.** Representative images of tGPH insulin-indicator responses to exogenously applied human insulin in fat-body explants from controls and animals expressing CRISPR-mediated deletion of *rickets* in the fat body, exposed to high-sugar diet for 10 hours before dissection. Scale bars, 25 microns.
